# Supplementary material
Source: publisher site journal article supplement (https://www.dovepress.com/article/558378)
Supplement: Supplementary file 1 [file Supplementary%20materials.docx]

**Supplementary materials**

**Supplementary Table S1.** Univariate logistic regression analysis of objective response rate predictors

| **Variables** | **Univariate analysis** | |
| --- | --- | --- |
| **OR (95% CI)** | ***p* value** |
| **Age (≥ 65 years old vs < 65 years old)** | 2.333 (0.216-25.245) | 0.486 |
| **Sex (female vs male)** | 1.000 (0.098-10.166) | 1 |
| **Primary tumor site (left-sided vs right-sided)** | 807737470 (0.000-NA) | 0.999 |
| **Number of metastatic sites (≥ 3 vs <3)** | 1076983221 (0.000-NA) | 0.999 |
| **HER2 expression by IHC score (3+ vs 2+)** | 0.333 (0.016-7.140) | 0.482 |
| **Number of previous lines of therapy (≥ 3 vs <3)** | 0.500 (0.037-6.683) | 0.6 |
| **Primary tumor resection** | 0.143 (0.010-1.995) | 0.148 |
| **Previous anti-EGFR treatment** | 1.500 (0.146-15.461) | 0.733 |
| **Previous anti-angiogenesis treatment** | 0.750 (0.048-11.648) | 0.837 |
| **Previous immunotherapy** | 3.000 (0.140-64.262) | 0.482 |

Abbreviations: OR, odd ratio; CI, confidence interval; NA, not available.
